# Supplementary material for: Complementary Operando Spectroscopy identification of in-situ generated metastable charge-asymmetry Cu2-CuN3 clusters for CO2 reduction to ethanol
Source: PubMed Central journal article supplement (PMC8917205; doi:10.1038/s41467-022-29035-8), 2022-03-11
Supplement: 41467_2022_29035_MOESM1_ESM.pdf [file 41467_2022_29035_MOESM1_ESM.pdf]

# Supplementary Information for

## **Complementary *Operando* Spectroscopy identification of metastable charge-asymmetric Cu<sub>2</sub>-CuN<sub>3</sub> clusters generated *in-situ* for CO<sub>2</sub> reduction to ethanol**

Su *et al.*

## 1. Supplementary Methods

**Materials.** Copper phthalocyanine, dicyandiamide,  $\text{KHCO}_3$ , ethanol was purchased from Sinopharm Chemical. Copper chloride and trimesic acid were purchased from Alfa Aesar. Deionized water was used for all synthesis.

**CO<sub>2</sub>RR products analysis.** Gas chromatography (GC, Shimadzu 2010) system was performed to detect CO<sub>2</sub> reduction gas products, equipped with a thermal conductivity detector (TCD) and flame ionization detector (FID). The inlet of GC was connected to the outlet of the cathode compartment for real-time monitoring. <sup>1</sup>H NMR experiments was carried out by NMR (Bruker 400 MHz) to analyze the liquid phase products. In detail, 300  $\mu\text{L}$  of the catholyte after reaction was mixed with 300  $\mu\text{L}$  of D<sub>2</sub>O containing 5 mM DMSO as an internal standard. Typically, NMR was tested with 2 s pre-saturation delay and 2 s relaxation delay. Chronoamperometric measurements were performed to obtain the Faradaic efficiency (F.E.) of products.

### Gaseous Products.

$$FE_{gas}(\%) = \frac{Q_{gas}}{Q_{total}} \times 100\% = \frac{\left(\frac{v}{60s/min}\right) \times \left(\frac{V_{gas}}{24000cm^3/mol}\right) \times N \times F \times 100\%}{j}$$

$v$ : gas flow rate.

$V_{gas}$ : H<sub>2</sub> or CO volume concentration.

$N$ : electrons number needed to form one molecule of H<sub>2</sub> or CO.

$F$ : Faraday constant as 96485 C/mol.

$j$ : recorded current.

### Liquid Products.

$$FE_{Liquid}(\%) = \frac{Q_{Liquid}}{Q_{total}} \times 100\% = \frac{n_{Liquid} \times N \times F \times 100\%}{j \times t}$$

$n_{Liquid}$ : liquid products amount in the cathodic compartment.

$t$ : reaction time.

**XAFS measurements.** N K-edge and C K-edge XAS spectra were carried out at BL12B station from the bending magnet in National Synchrotron Radiation Laboratory (NSRL). From 0.1 to 1 keV there are three gratings covering photon energies at BL12B. The energy resolution is  $\sim 0.2$  eV. Catalysts were coated carbon tape for XAS. TEY mode was used to record the XAS data.

Copper K-edge XAFS data of catalysts were measured at BL14W1 beamline in Shanghai Synchrotron Radiation Facility which is operated at 3.5 GeV with the top-up current of 200 mA. The synchrotron radiation was monochromatized using the Si (111) liquid nitrogen cooled double-crystal monochromator. The incident X-ray intensity was monitored with the N<sub>2</sub>-filled ion chamber ( $I_0$ ) in front of catalysts. XAFS data were measured with fluorescence mode using the Ar-filled Lytle detector. The X-ray energy was calibrated using the Cu metal foil for Cu K-edge. The XAFS spectra of references were carried out with the transmission mode using the N<sub>2</sub>-filled ionization chamber ( $I_I$ ) behind references.

**XAFS Data Analysis.** EXAFS data were got by taking out the background and normalizing with the edge-jump by Athena and Artemis in the IFEFFIT package. Cu K-edge  $k^3$ -weighted  $\chi(k)$  data of  $k$ -space ranging from 2.0–11.5 Å<sup>-1</sup> were FT to R-space. Quantitative curve fittings were carried out to obtain the structural parameters around copper atoms by the ARTEMIS module<sup>1</sup>.

EXAFS equation was shown as following:

$$\chi(k) = \sum_j \frac{N_j S_o^2 F_j(k)}{k R_j^2} \exp[-2k^2 \sigma_j^2] \exp\left[\frac{-2R_j}{\lambda(k)}\right] \sin[2k R_j + \phi_j(k)]$$

$F_j(k)$  (backscattering amplitude of curved-wave),  $\phi_j(k)$  (phase shift) and  $\lambda(k)$  (mean free path) were calculated by FEFF8.2.  $S_o^2$  (amplitude reduction factor) was fixed in the fitting.  $N_j$  (coordination number of atoms in the  $j$ th shell),  $R_j$  (distance between the absorbing copper atom and  $j$ th shell atoms),  $\sigma_j$  (Debye-Waller factor of the  $j$ th shell) and  $\Delta E_0$  (edge-energy shift) were fit freely.

XANES simulations were carried out with the FDMNES program, which is based on the Finite Difference Method (FDM) to solve the Schrödinger equation and uses the Green formalism on the muffin-tin potential.<sup>2</sup> The final states were calculated in this cluster with a fixed radius, with the atoms inside the sphere considered in the calculation. To achieve a balance between the good calculation and time spending, a radius of 6 Å was selected for the sphere. The models were performed for every considered Cu atom to develop corresponding Cu speciation specific. The features of simulated XANES spectrum were adjusted by modifying the convolution parameters dependent theoretical XANES systems.

## 2. Supplementary Figures and Tables

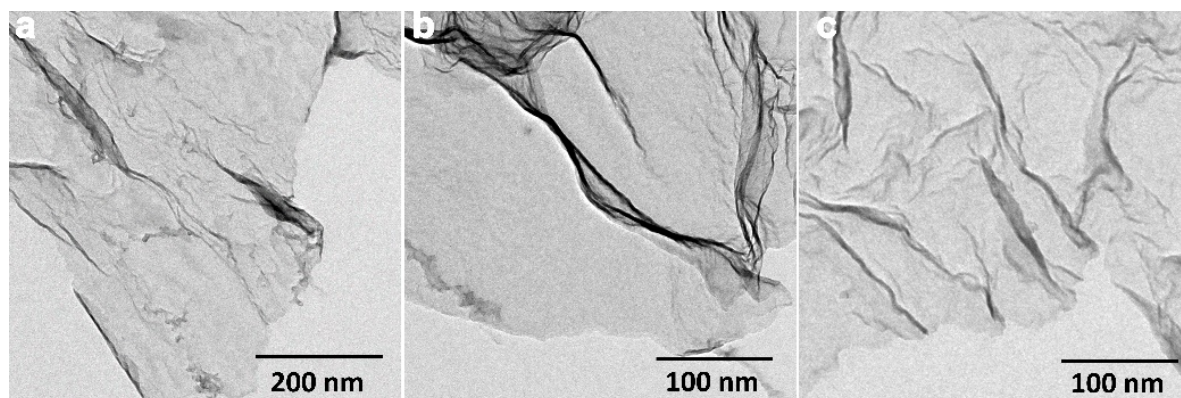

**Supplementary Fig. 1** TEM characterizations. **a** NC. **b** Cu/N<sub>0.02</sub>C. **c** Cu/N<sub>0.11</sub>C.

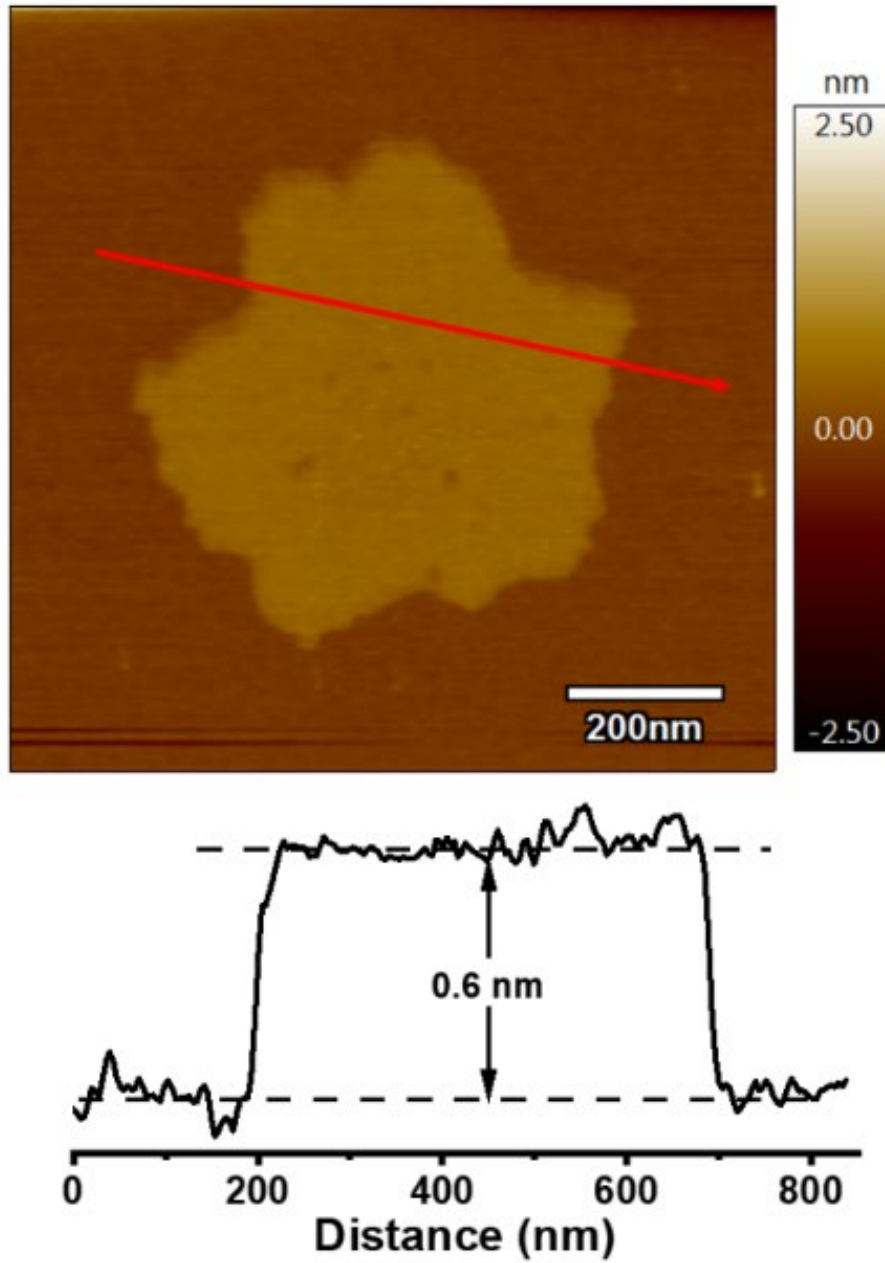

Supplementary Fig. 2 The AFM image of Cu/N<sub>0.14</sub>C.

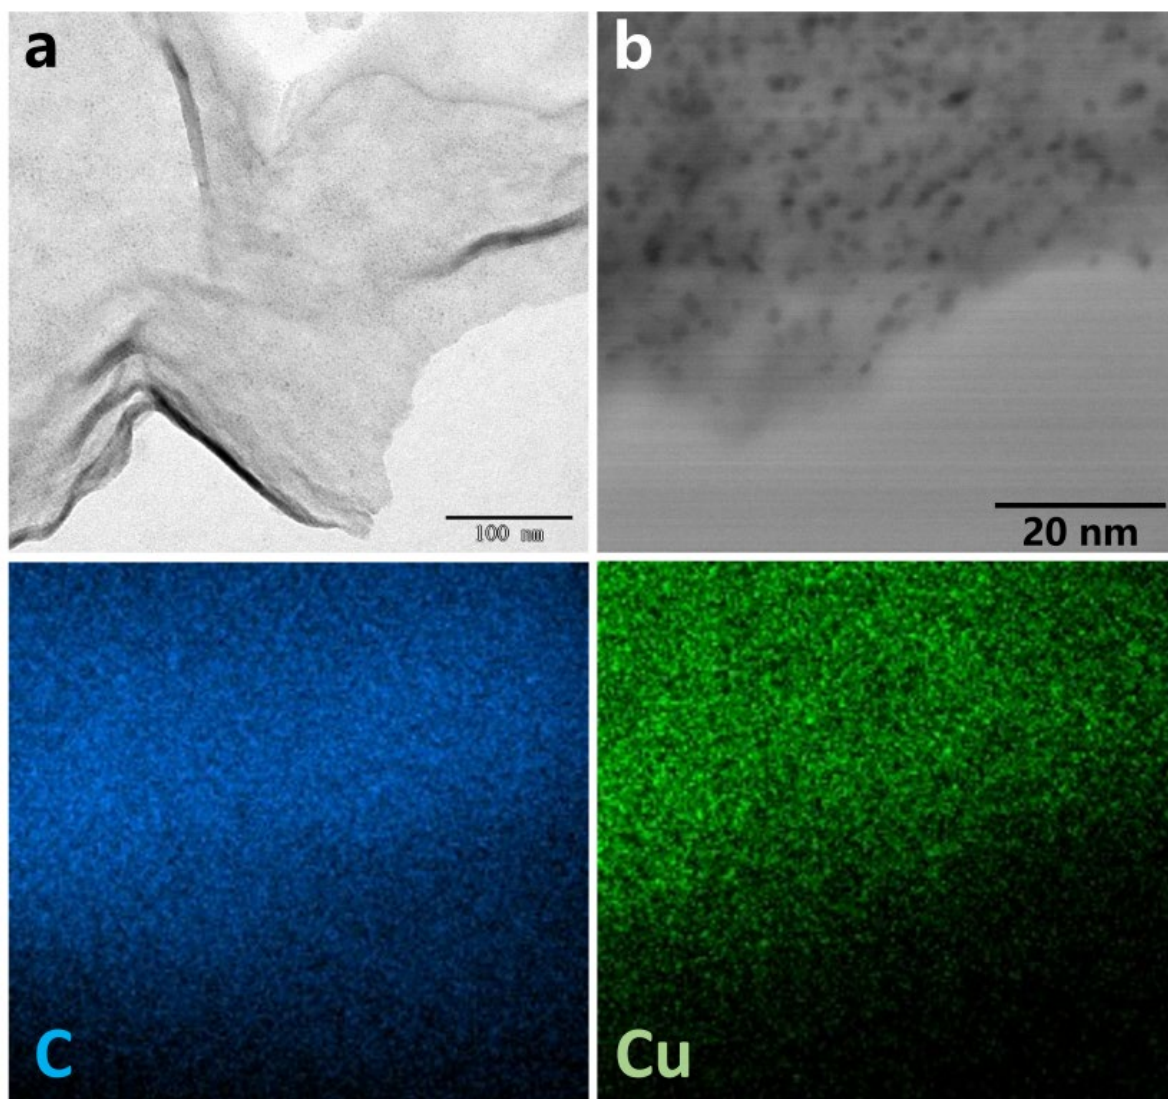

**Supplementary Fig. 3** The TEM and EDS elemental mapping images of Cu/C.

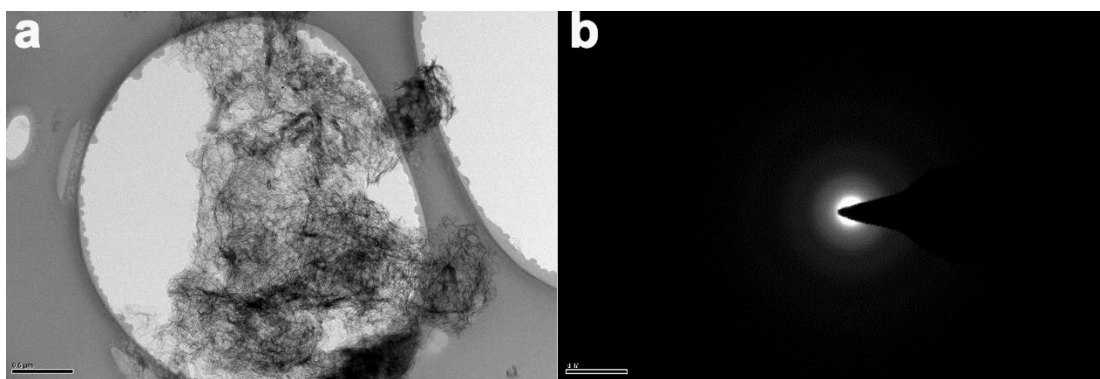

**Supplementary Fig. 4 TEM characterizations. a** The TEM of Cu/N<sub>0.14</sub>C. **b** The electron diffraction pattern of Cu/N<sub>0.14</sub>C.

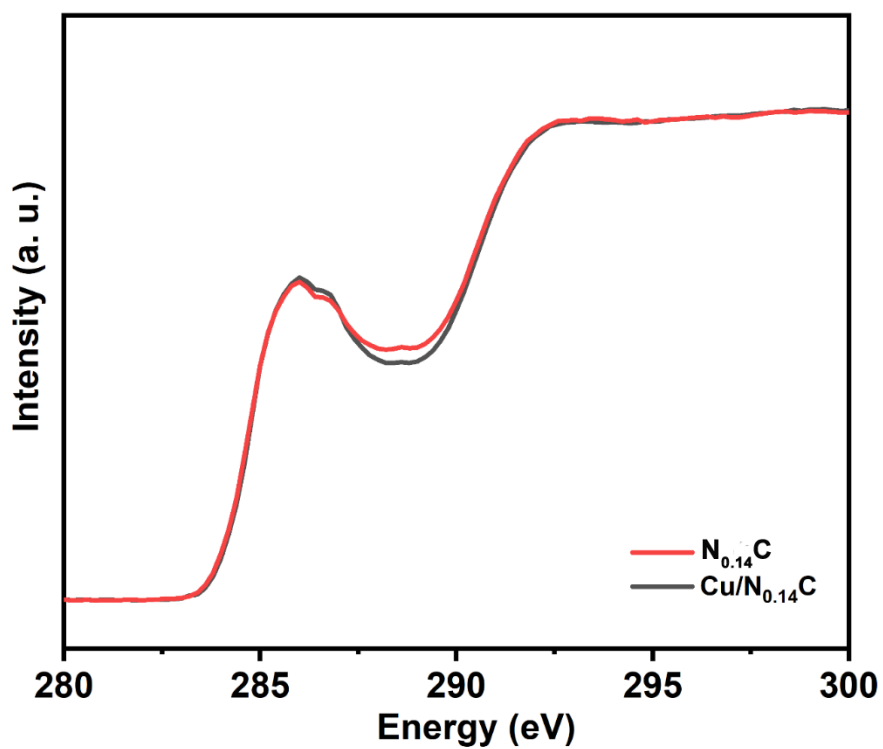

**Supplementary Fig. 5** The C *K*-edge XAS spectra of  $Cu/N_{0.14}C$  and  $N_{0.14}C$ .



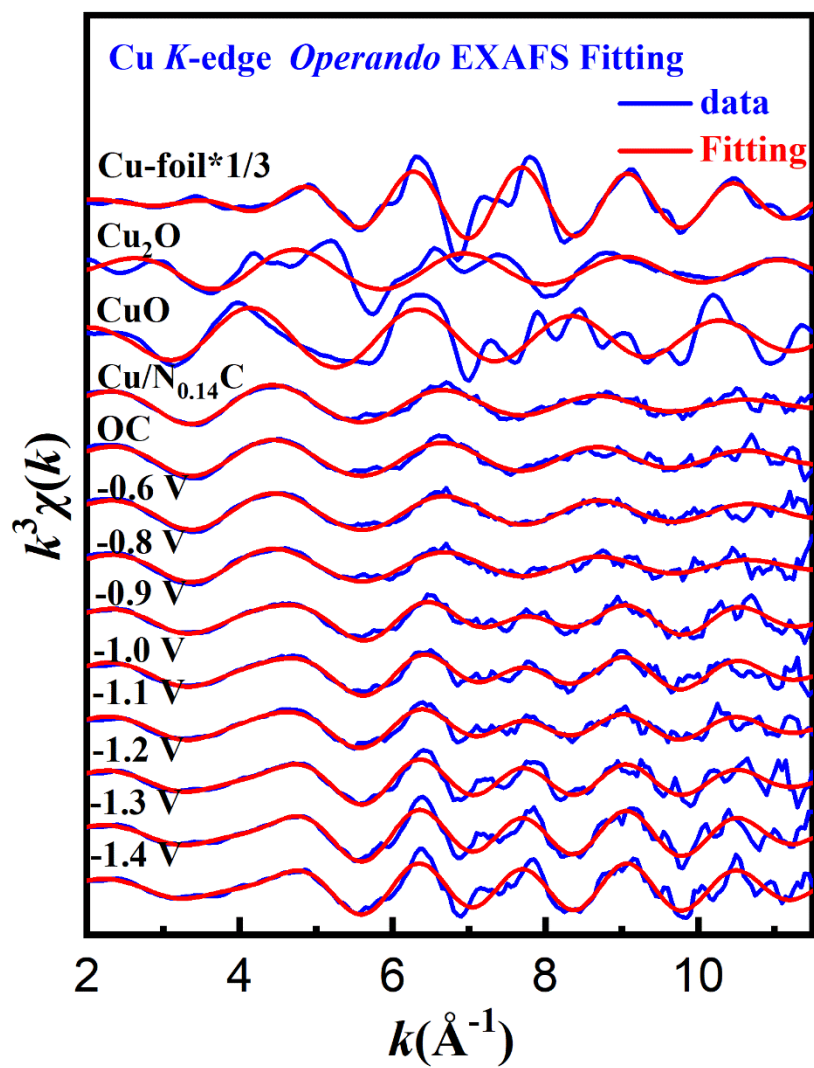

Supplementary Fig. 6 The FT-EXAFS fitting of Cu K-edge in  $k$ -space for Cu/ $\text{N}_{0.14}\text{C}$ ;

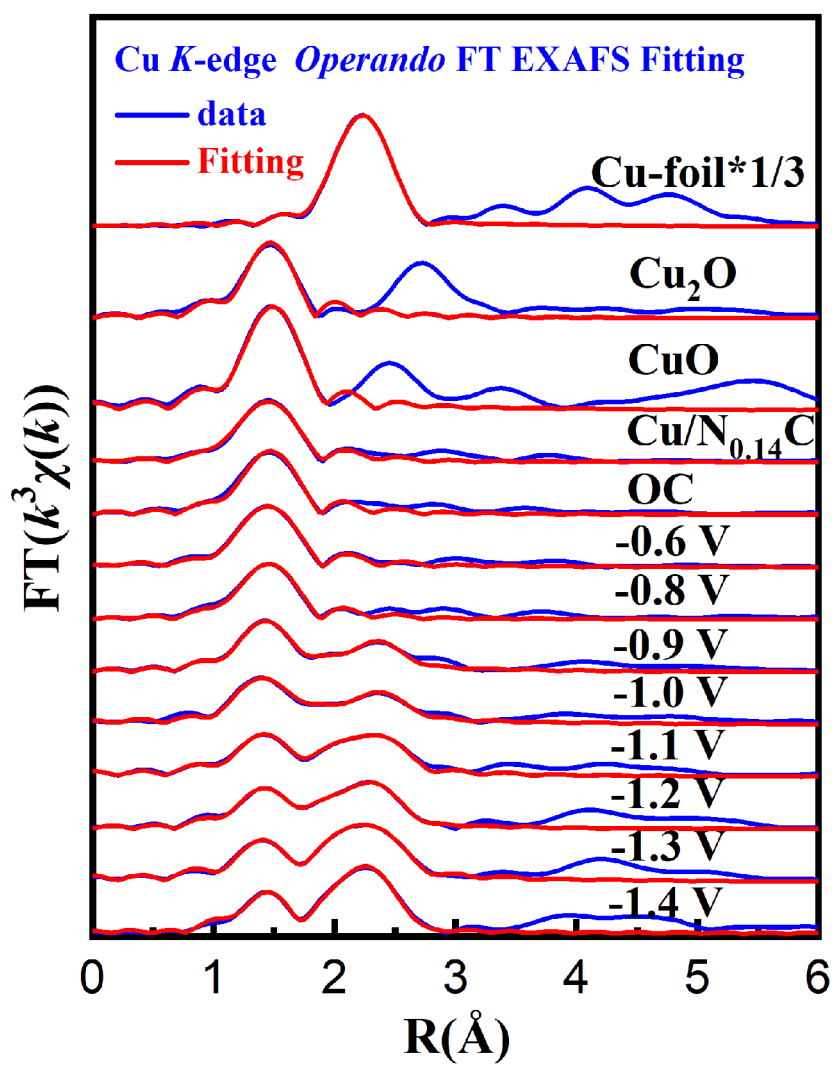

Supplementary Fig. 7 The FT-EXAFS fitting of Cu *K*-edge in R-space for Cu/N<sub>0.14</sub>C

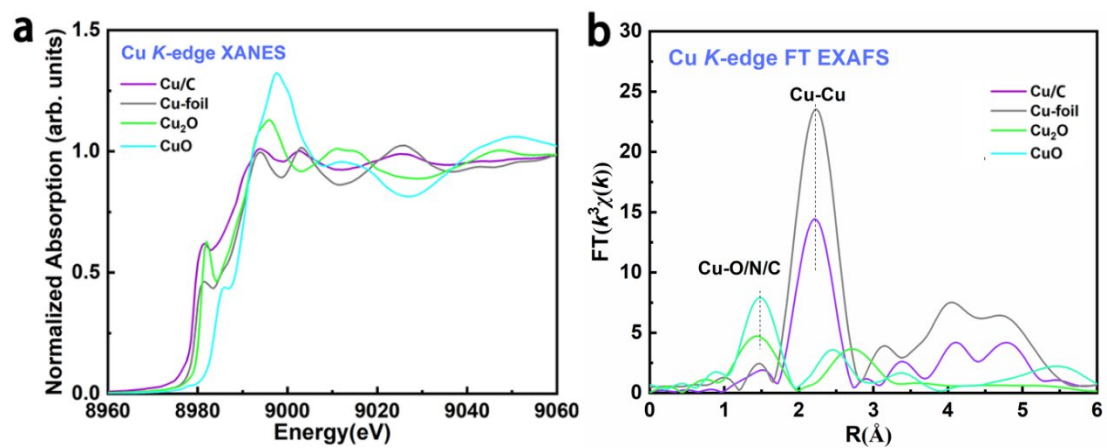

**Supplementary Fig. 8 XAFS characterizations of Cu/C. a** Cu K-edge XANES spectra of Cu/C with the references. **b** FT-EXAFS spectra.

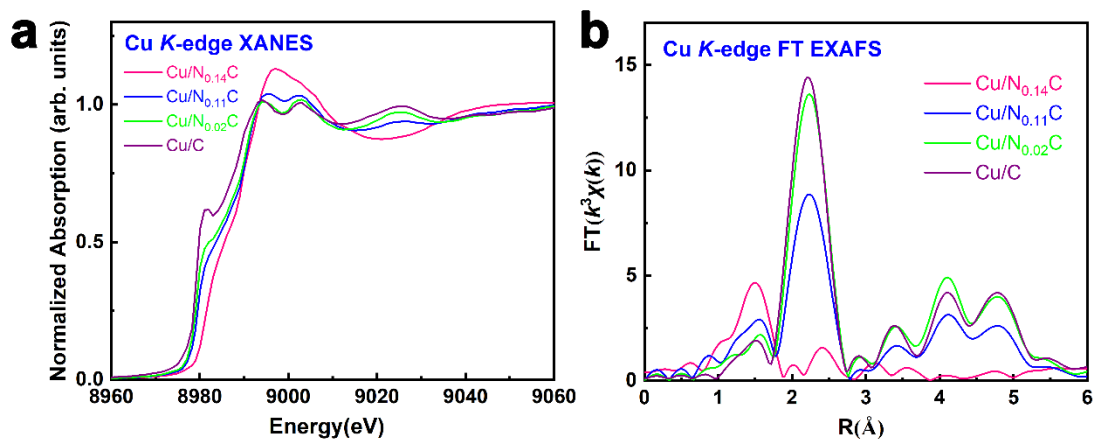

**Supplementary Fig. 9 XAFS characterizations of Cu/N<sub>x</sub>C.** **a** Cu K-edge XANES spectra of Cu/N<sub>0.14</sub>C, Cu/N<sub>0.11</sub>C, Cu/N<sub>0.02</sub>C as well as Cu/C. **b** FT-EXAFS spectra.

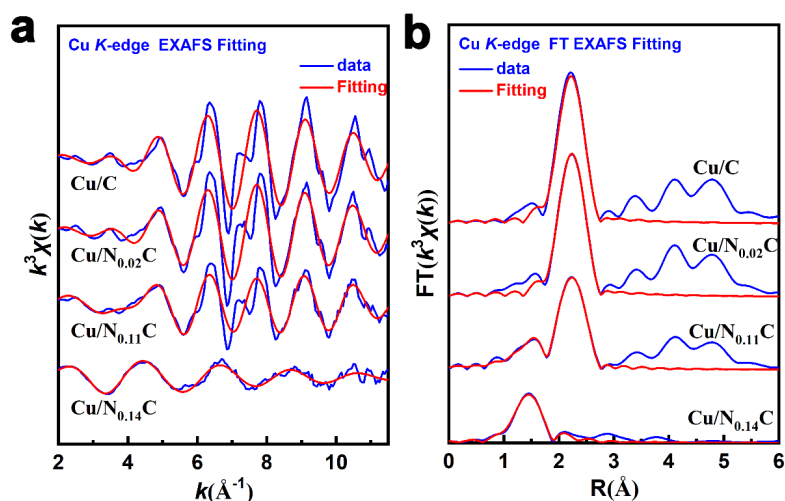

**Supplementary Fig. 10** Fitting results of Cu/N<sub>x</sub>C. **a** The FT-EXAFS fitting of Cu *K*-edge in *R*-space for Cu/N<sub>0.14</sub>C, Cu/N<sub>0.11</sub>C, Cu/N<sub>0.02</sub>C and Cu/C. **b** *k*-space. To further explore the N-doped that affect the CO<sub>2</sub>RR activity, the XANES and FT-EXAFS of Cu/N<sub>0.14</sub>C, Cu/N<sub>0.11</sub>C, Cu/N<sub>0.02</sub>C as well as Cu/C without the N-doping were plot in Fig S9a, Fig S9b. The XANES of Cu/N<sub>0.11</sub>C, Cu/N<sub>0.02</sub>C and Cu/C unraveled that the Cu ions were reduced to metallic copper with the decreasing of mass contents ratio of nitrogen to carbon. The FT-EXAFS data also show the intensity of the peak for Cu–Cu coordination increased while the peak at 1.5 Å for Cu–N/O coordination decreased. The FT EXAFS fitting results was shown in Fig S10 and Table S2. These results revealed that the copper in Cu/N<sub>0.11</sub>C, Cu/N<sub>0.02</sub>C and Cu/C agglomerated into metallic particles. The sizes of metallic particles are proportional to mass contents ratio of nitrogen to carbon. In the Cu/N<sub>0.14</sub>C, the sizes of Cu particles were so small that the particles were oxidized to CuO<sub>x</sub> clusters. These results agreed results well with XRD and HAADF–STEM results and indicated that N-doped promotes the dispersion of CuO<sub>x</sub> clusters in the as-synthesized Cu/N<sub>0.14</sub>C catalyst and played a critical role in improving FE for direct CO<sub>2</sub>-to-ethanol electrochemical conversion.

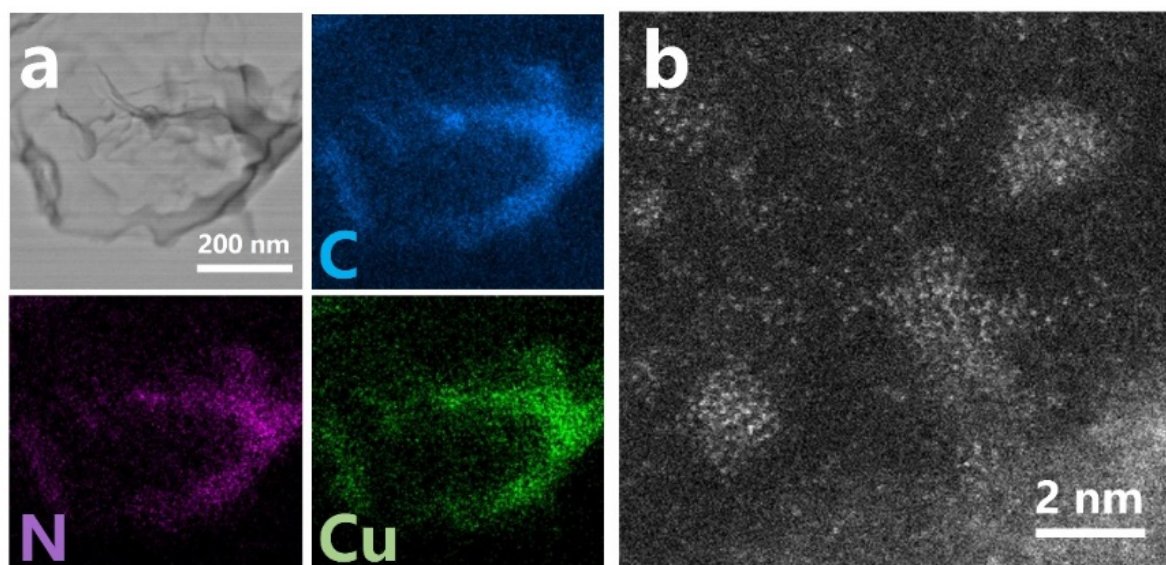

**Supplementary Fig. 11** TEM image of Cu/N<sub>0.14</sub>C after long-term CO<sub>2</sub>RR electrolysis

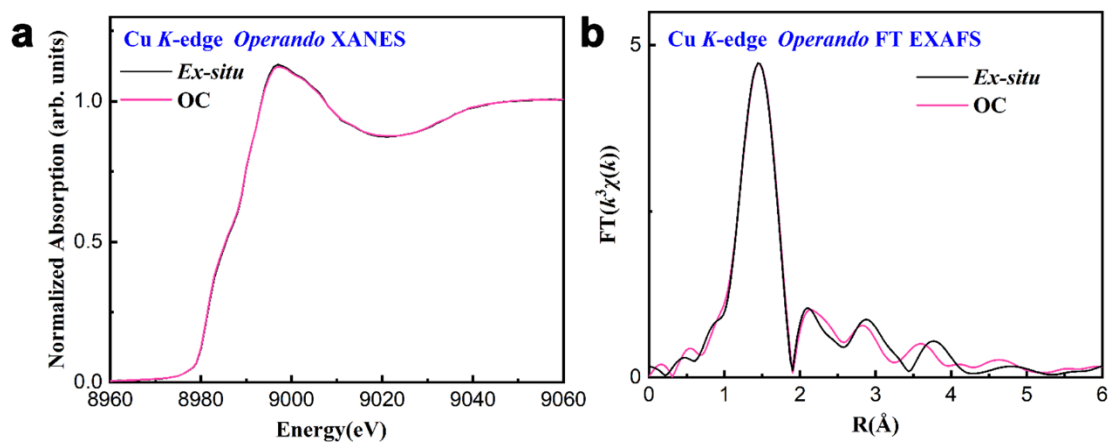

**Supplementary Fig. 12** *Ex-situ* and OC XAFS characterizations of Cu/N<sub>0.14</sub>C. **a** The Cu *K*-edge XANES spectra and **b** The Cu *K*-edge FT-EXAFS spectra of OC and *ex-situ* sample.

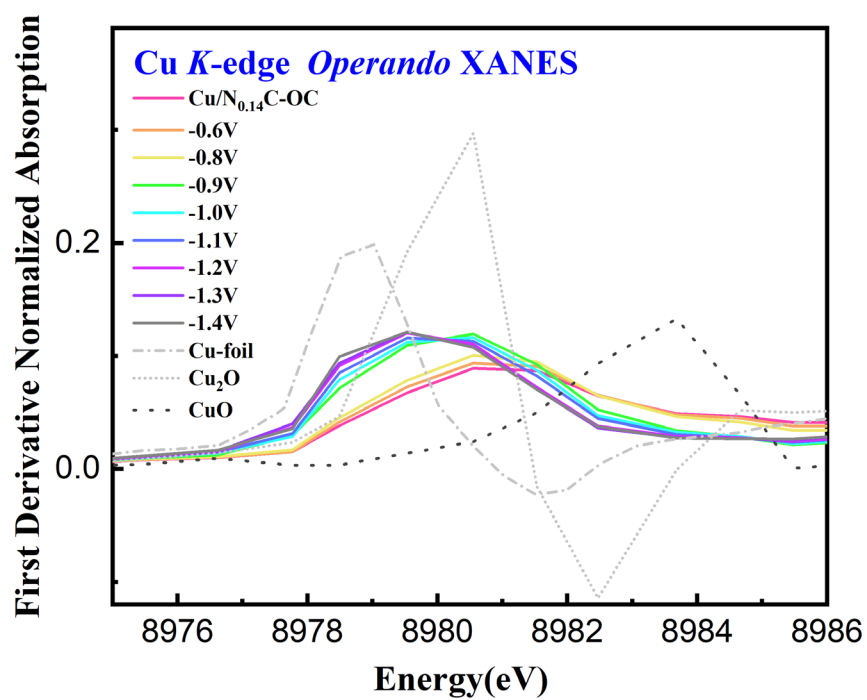

**Supplementary Fig. 13** The Cu *K*-edge First derivative normalized absorption of Cu/N<sub>0.14</sub>C at different potential.



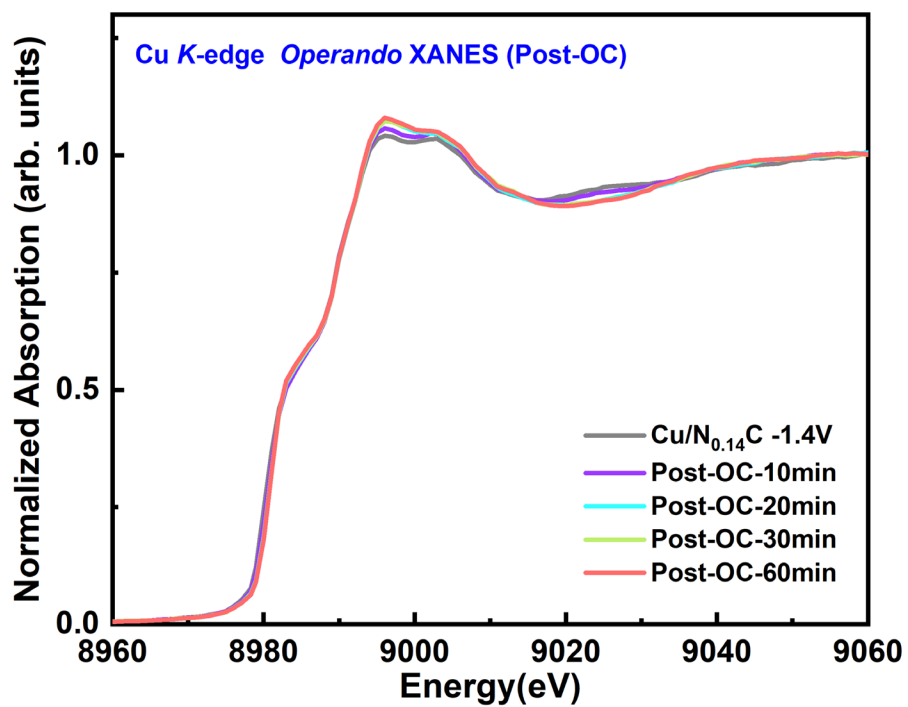

**Supplementary Fig. 14** The Cu *K*-edge *operando* XANES spectra of Cu/N<sub>0.14</sub>C after the applied potential was switched off and other conditions remained unchanged.

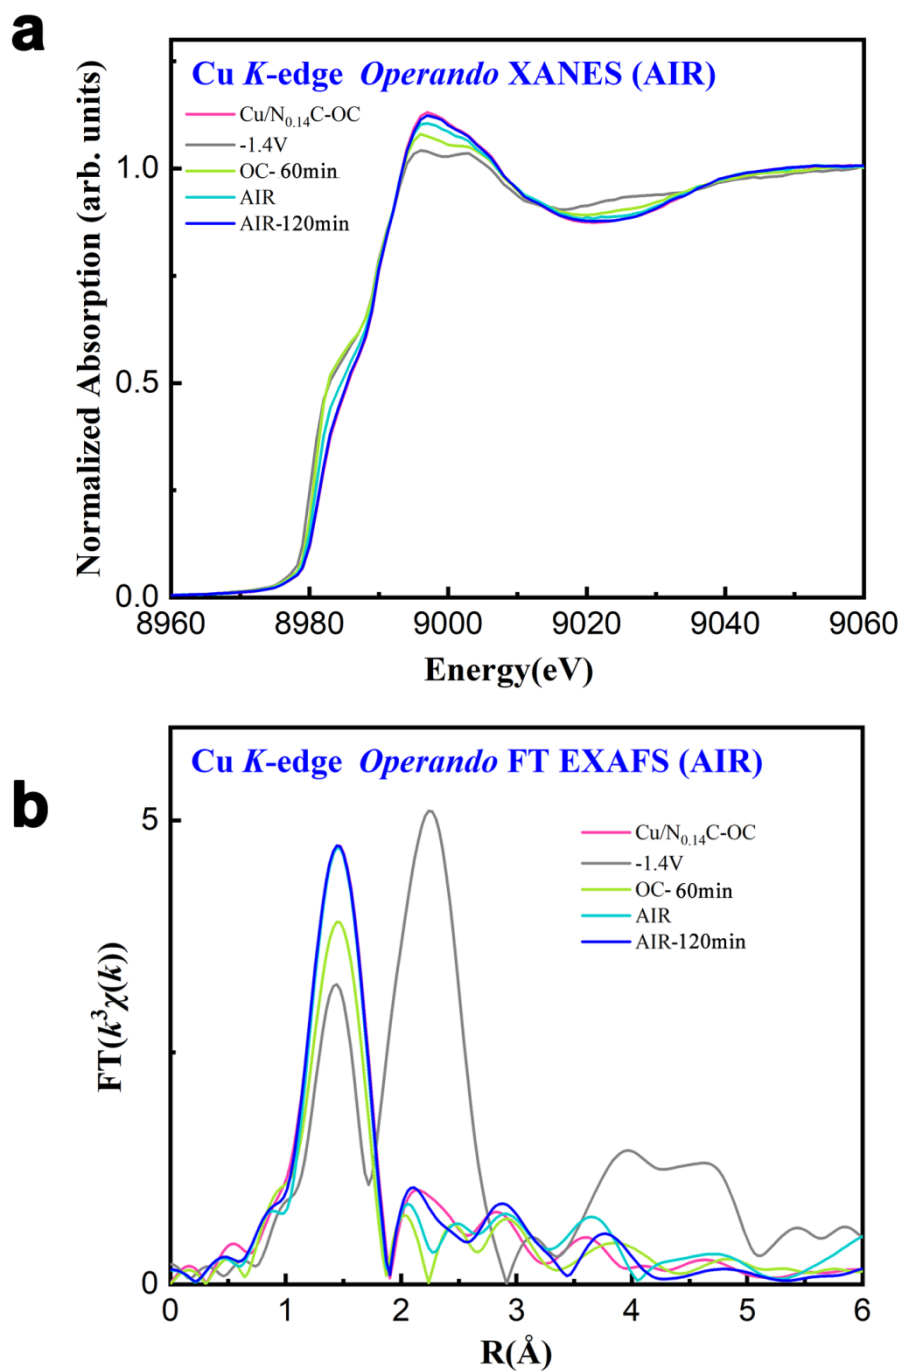

**Supplementary Fig. 15 XAFS characterizations after exposure to air.** **a** The Cu *K*-edge *operando* XANES spectra of Cu/N<sub>0.14</sub>C-Post-OC and exposure to air. **b** *Operando* FT-EXAFS spectra of Cu/N<sub>0.14</sub>C-Post-OC and exposure to air.

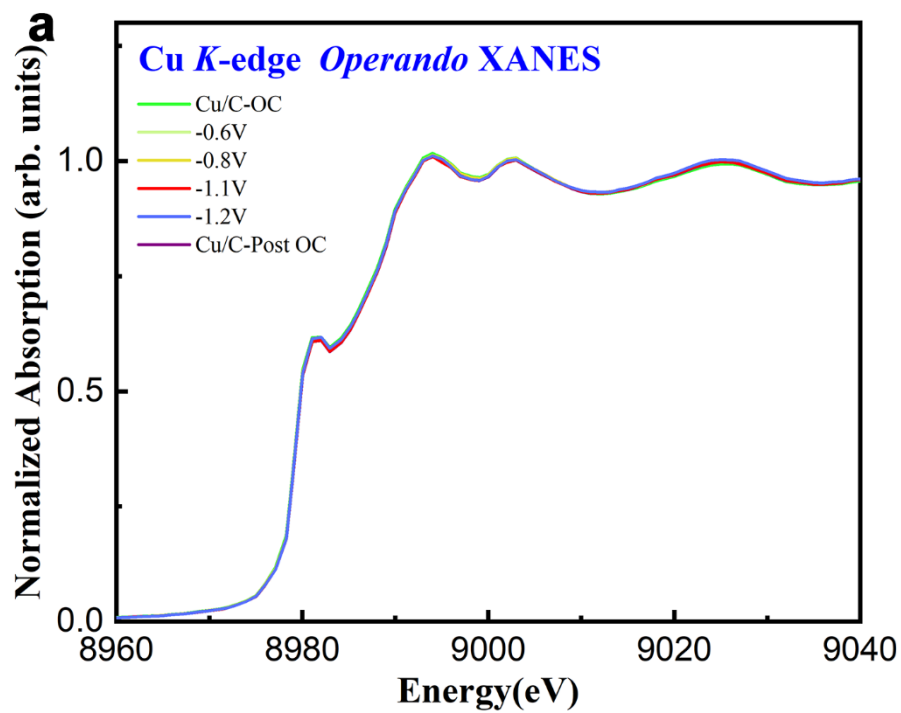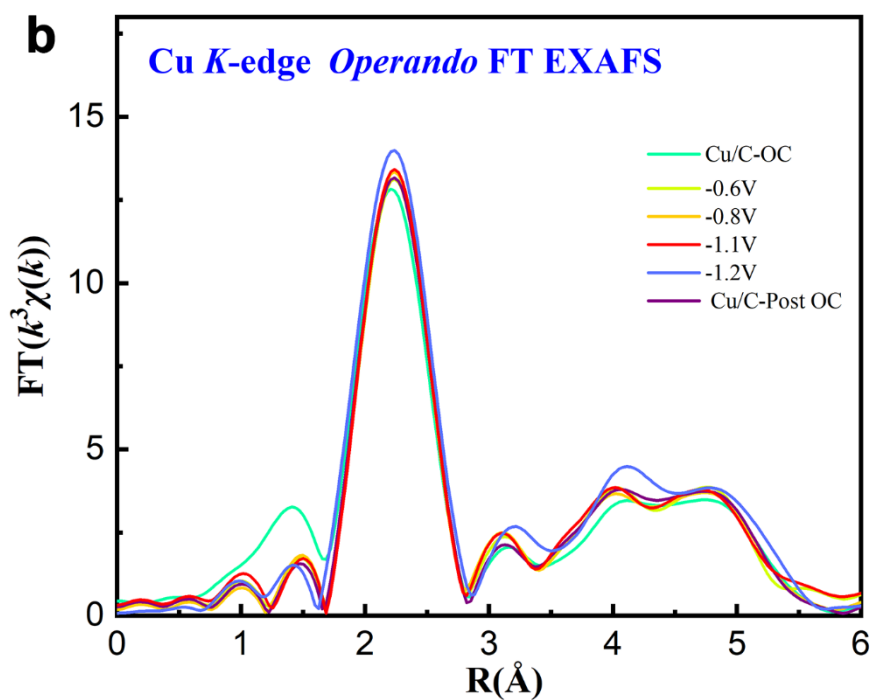

**Supplementary Fig. 16 Operando XAFS characterization of Cu/C. a** The Cu K-edge *operando* XANES spectra of Cu/C. **b** The Cu K-edge *operando* FT-EXAFS spectra of Cu/C.

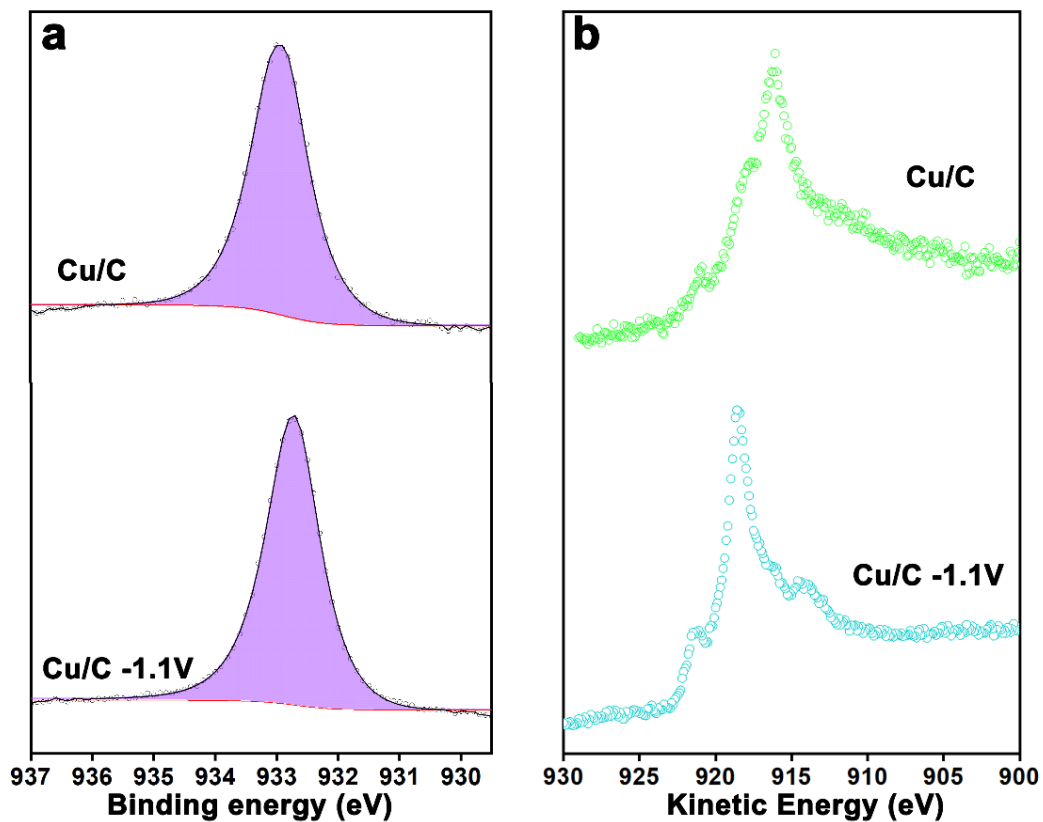

Supplementary Fig. 17 *Quasi-in situ* XPS characterizations of Cu/C. **a** The *Quasi-in situ* XPS spectroscopy of Cu/C. **b** The AES spectroscopy of Cu/C; All potentials are normalized to RHE.

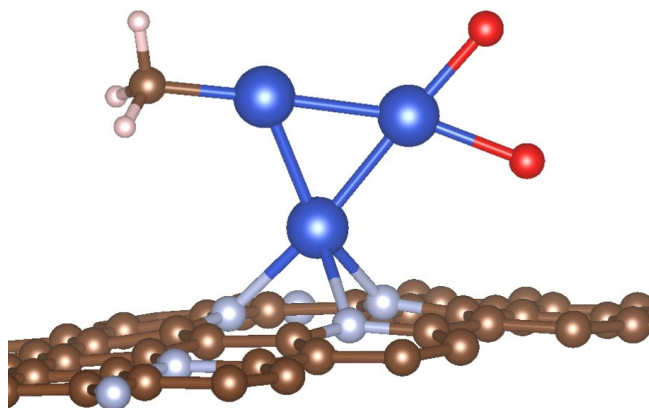

**Supplementary Fig. 18** The atomic configuration of the Cu<sub>2</sub>-CuN<sub>3</sub> cluster under *operando* conditions. The balls in brown, gray, red, pink and blue, represented C, N, O, H and Cu, respectively.

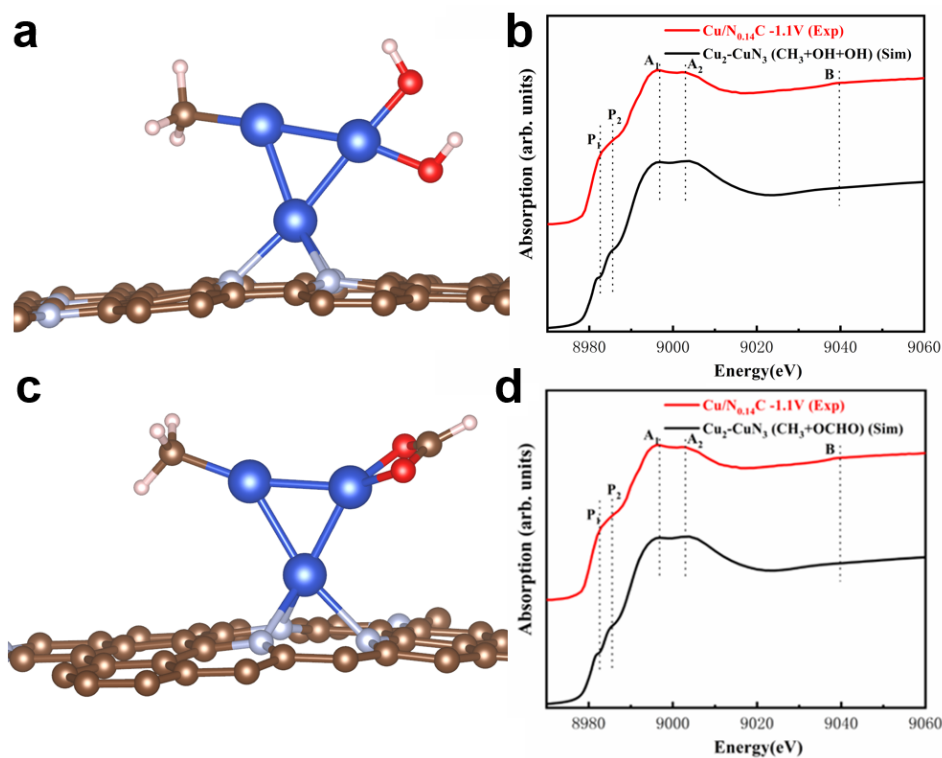

**Supplementary Fig. 19 The atomic configuration of clusters and simulated XANES.** **a** The atomic configuration of Cu<sub>2</sub>-CuN<sub>3</sub> cluster with CH<sub>3</sub>\* and two OH\*. **b** Comparison between the Cu K-edge XANES experimental spectrum (black line) and the theoretical spectrum (red line) simulated with the Cu<sub>2</sub>-CuN<sub>3</sub> cluster with CH<sub>3</sub>\* and two OH\*. **c** Cu<sub>2</sub>-CuN<sub>3</sub> cluster with OCHO\* and CH<sub>3</sub>\*. **d** Comparison between *operando* XANES (red line) and the theoretical spectrum (black line) for the Cu<sub>2</sub>-CuN<sub>3</sub> cluster with OCHO\* and CH<sub>3</sub>\*. The balls in brown, gray, red, pink and blue, represented C, N, O, H and Cu, respectively. The dotted lines corresponding to spectral XANES features were added to facilitate comparison.

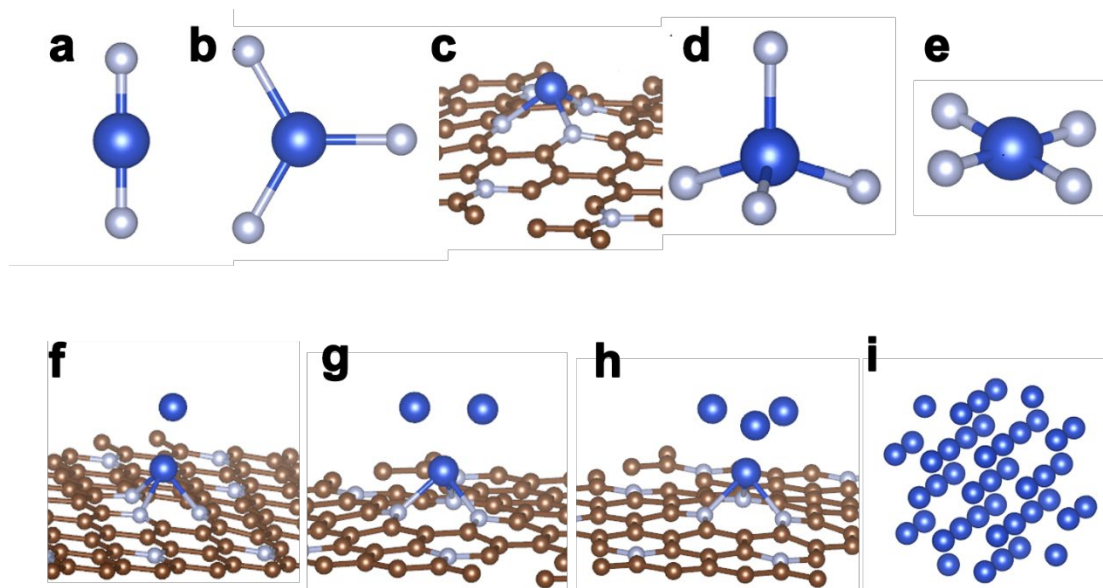

**Supplementary Fig. 20** Possible sites according with the fitting results of *operando* XAFS. Cu, C and N atoms are in blue, brown and grey, respectively. *Operando* XAFS and *Quasi-in situ* XPS results revealed that the  $\text{Cu}^{2+}$  was reduced to  $\text{Cu}^+$  species at the -1.1 V vs. RHE. The coordination number of  $\text{Cu}^+$  is generally either 2, 3 or 4<sup>2</sup>. Therefore, there are nine possible structures of the *in situ* generated Cu species of  $\text{Cu}/\text{N}_{0.14}\text{C}$  at -1.1 V vs. RHE, according with the fitting coordination number of Cu–N and Cu–Cu. **a** Cu–N<sub>2</sub> site with linear geometry, **b** Cu–N<sub>3</sub> sites with trigonal planar and **c** triangle pyramid geometry respectively, Cu–N<sub>4</sub> sites with **d** tetrahedral and **e** square planar geometry respectively, **f** Cu–CuN<sub>3</sub> site, **g** Cu<sub>2</sub>–CuN<sub>3</sub> site, **h** Cu<sub>n</sub>–CuN<sub>3</sub>(n>2) site and **i** Cu nanoparticles.

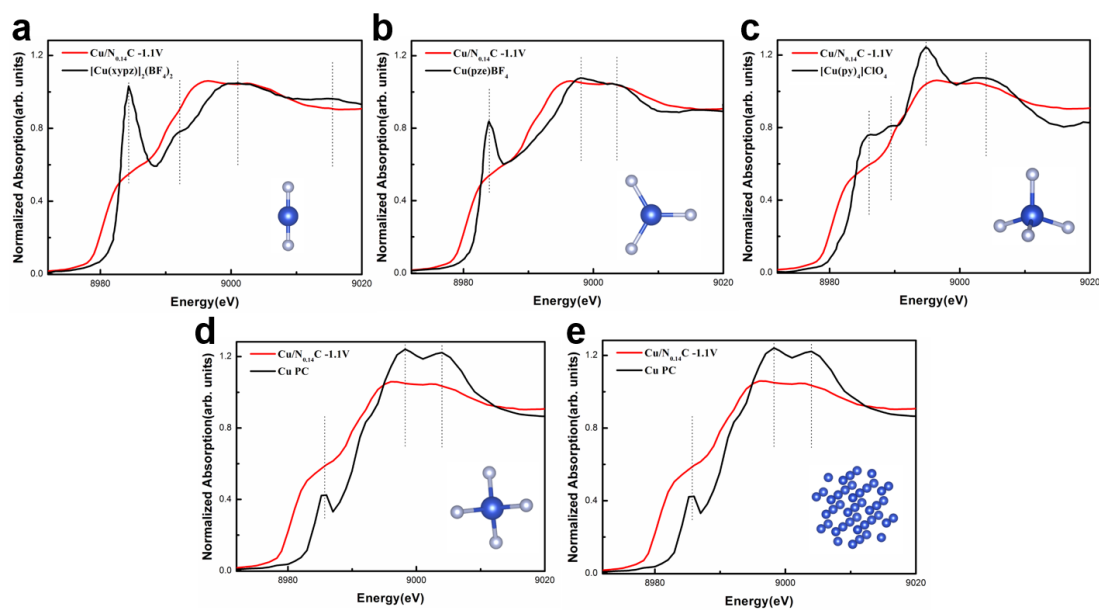

**Supplementary Fig. 21 XANES of possible sites.** **a** Cu-N<sub>2</sub> site, **b** Cu-N<sub>3</sub> site with trigonal planar geometry, **c** Cu-N<sub>4</sub> sites with tetrahedral and **d** square planar geometry respectively, and **e** Cu nanoparticles with the Cu N<sub>0.14</sub>C at -1.1 V vs. RHE. The XANES spectra shape can be more sensitive and contains more data about the material, such as the geometry around the absorbing atom and its electronic structure<sup>3</sup>. XANES spectra of standard samples with similar local structure around Cu ions of Cu-N<sub>2</sub>, Cu-N<sub>3</sub> site with trigonal planar geometry, Cu-N<sub>4</sub> sites and Cu nanoparticles were measured to compare with *operando* XAFS experiment of the Cu N<sub>0.14</sub>C at -1.1 V vs. RHE<sup>4</sup>. The features of Cu-N<sub>2</sub>, Cu-N<sub>3</sub> site with trigonal planar geometry, Cu-N<sub>4</sub> sites and Cu nanoparticles XANES spectra are notable different from that of *operando* XANES spectra at -1.1 V vs. RHE, indicating that these structures could be ruled out.



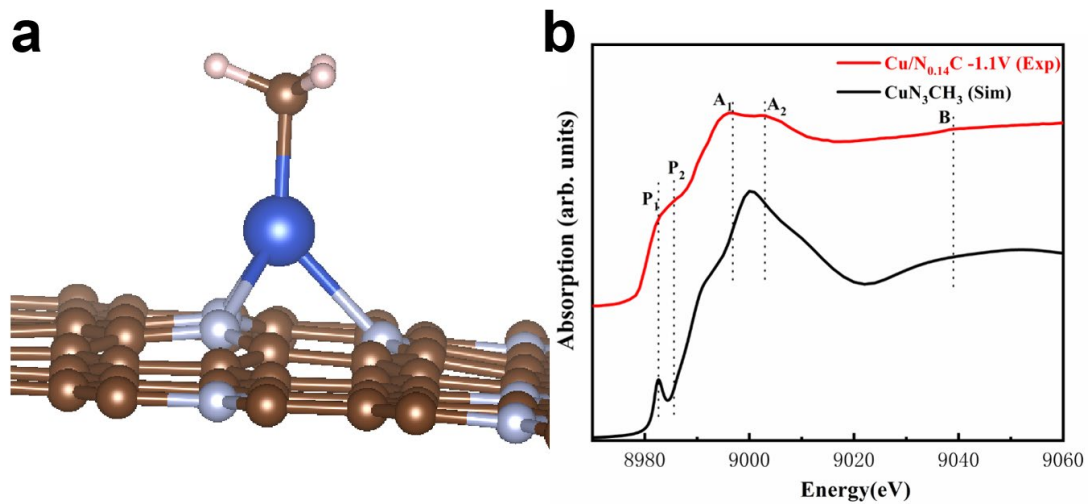

**Supplementary Fig. 22 The atomic configuration of cluster and simulated XANES of CuN<sub>3</sub>CH<sub>3</sub>.** **a** The atomic configuration of CuN<sub>3</sub>CH<sub>3</sub>. The balls in brown, gray, red, pink and blue, represented C, N, O, H and Cu, respectively. **b** Comparison between the Cu K-edge XANES experimental spectra (black line) and the theoretical spectra (red line).

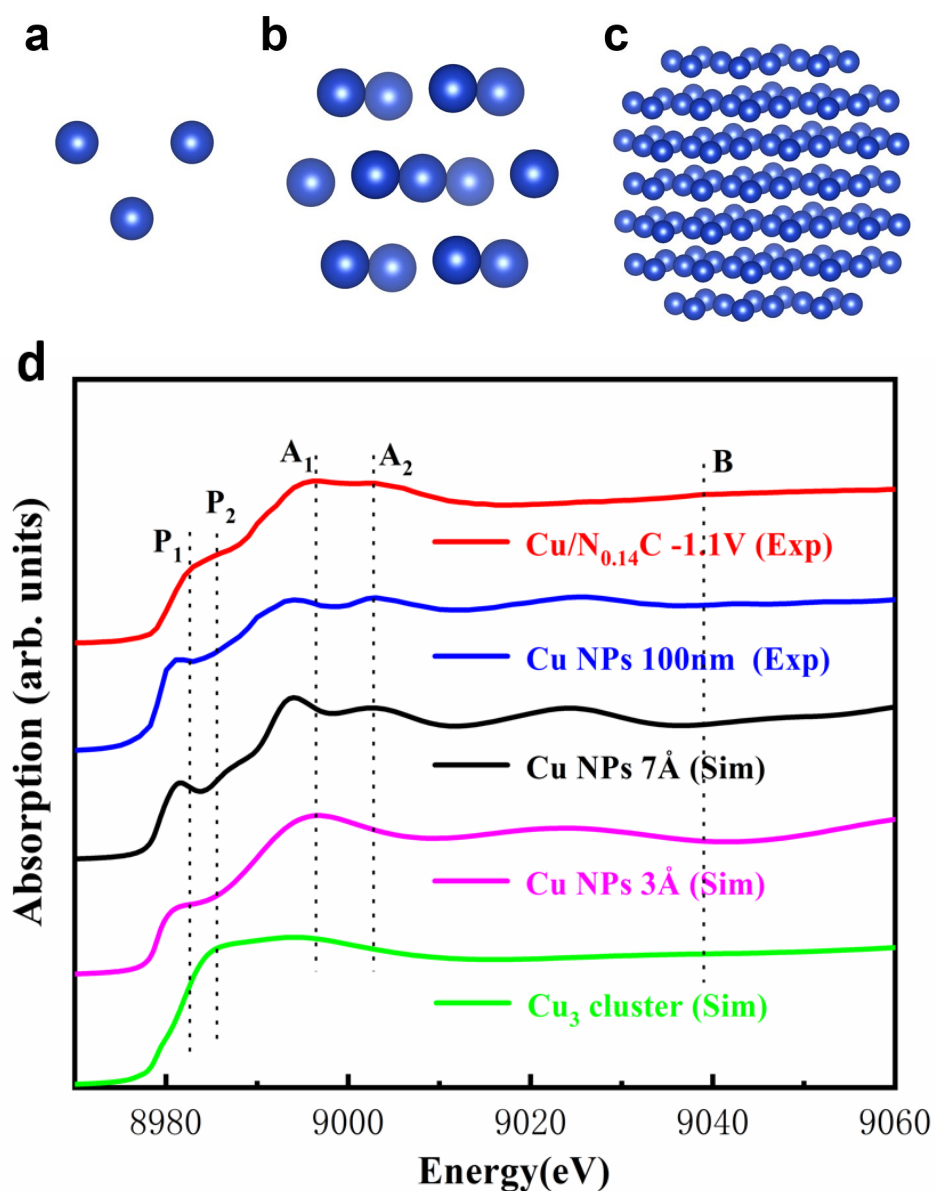

**Supplementary Fig. 23 The atomic configuration of cluster and simulated XANES of different size Cu NPs clusters. a** The atomic configuration of Cu<sub>3</sub>. **b** 13 atoms cluster (R=3Å). **c** 135 atoms cluster (R=7Å). **d** Experimental XANES of 100 nm Cu NPs and theoretical spectra of Cu<sub>3</sub> cluster, 13 atoms cluster (R=3Å), 135 atoms cluster (R=7Å) with the Cu/N<sub>0.14</sub>C at -1.1 V vs. RHE. The dotted lines corresponding to spectral XANES features were added to facilitate comparison.

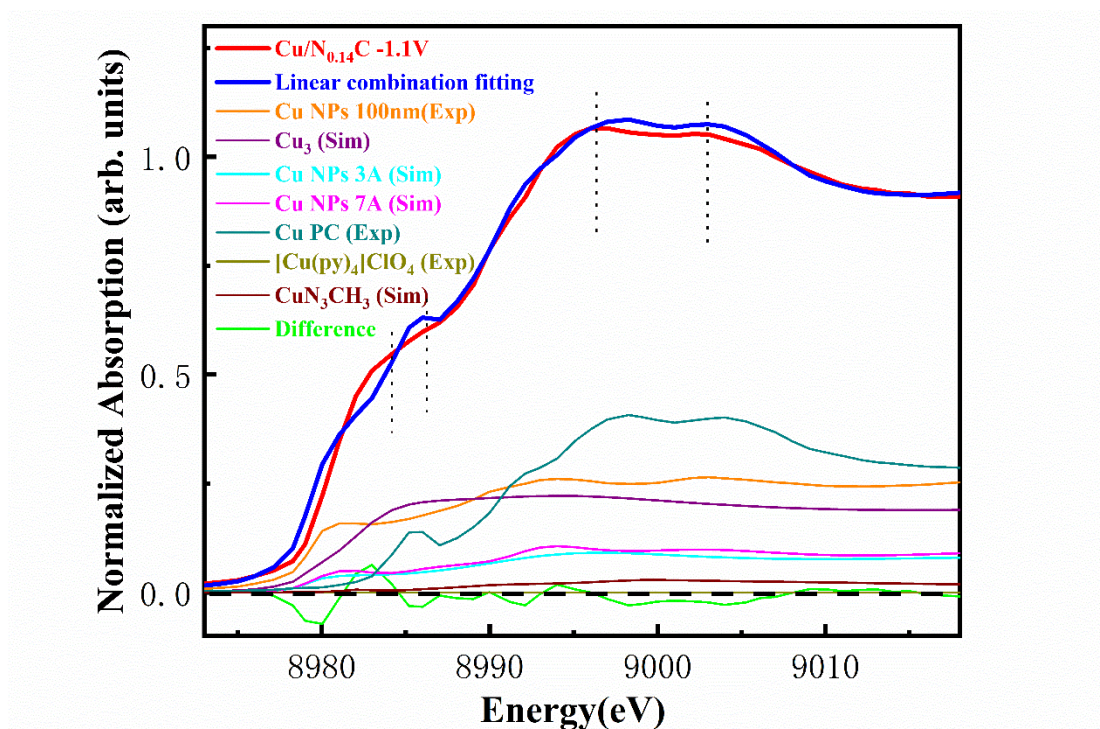

**Supplementary Fig. 24** The linear combination fitting of the experimental spectrum of the Cu/N<sub>0.14</sub>C at -1.1 V vs. RHE with the simulated spectra for CuN<sub>3</sub>-CH<sub>3</sub> and Cu NPs (Cu<sub>3</sub> cluster, 3 Å cluster, and 7 Å cluster) and the experimental spectra for the [Cu(py)<sub>4</sub>]ClO<sub>4</sub> (Cu-N<sub>4</sub> site with the tetrahedral geometry), copper porphyrin (Cu-N<sub>4</sub> site with the square planar geometry) and 100nm Cu NPs.

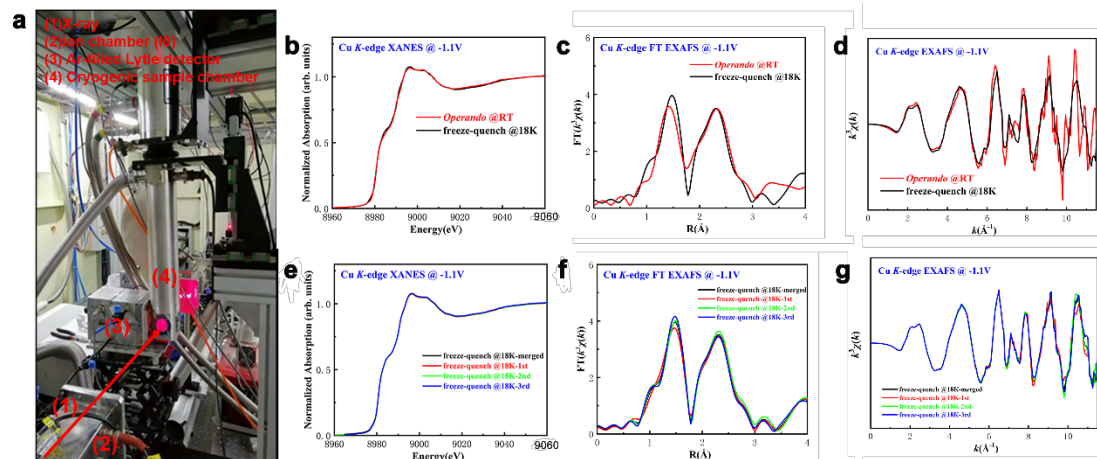

**Supplementary Fig. 25 Freeze-quench XAS. a** *In-house* designed cell for XAS test at 18 K. **b** Comparison between XANES of the Cu/N<sub>0.14</sub>C obtained by the freeze-quench method (black line) and *operando* method for -1.1 V vs. RHE at room temperature (red line). **c** FT-EXAFS with the  $k^3\chi(k)$ . **d**  $k^3\chi(k)$ . **e** Comparison of three times XANES by the freeze-quench method with the merged data (black line). **f** FT-EXAFS with the  $k^3\chi(k)$ . **g**  $k^3\chi(k)$ .

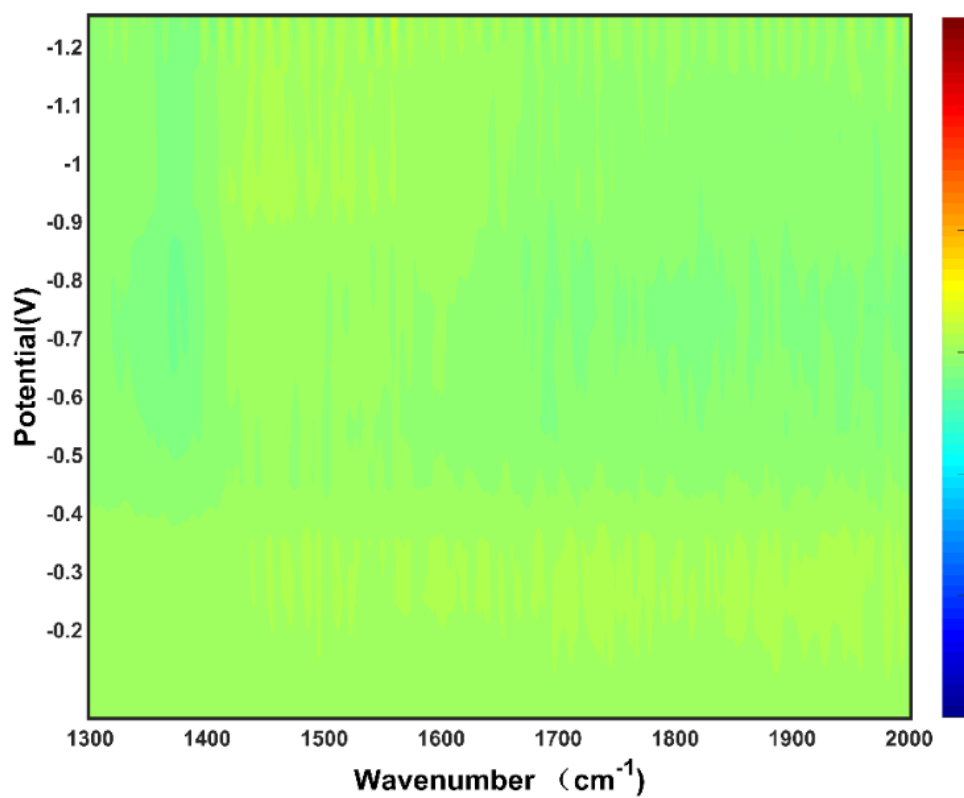

**Supplementary Fig. 26** *Operando* FTIR spectroscopy for Cu/C. Potentials were normalized to RHE. The infrared bands over the Cu/C catalyst were not obviously observed even after applying potential at -1.2 V vs. RHE. These results were consistent with the low C<sub>2+</sub> formation rates of the Cu/C catalyst.

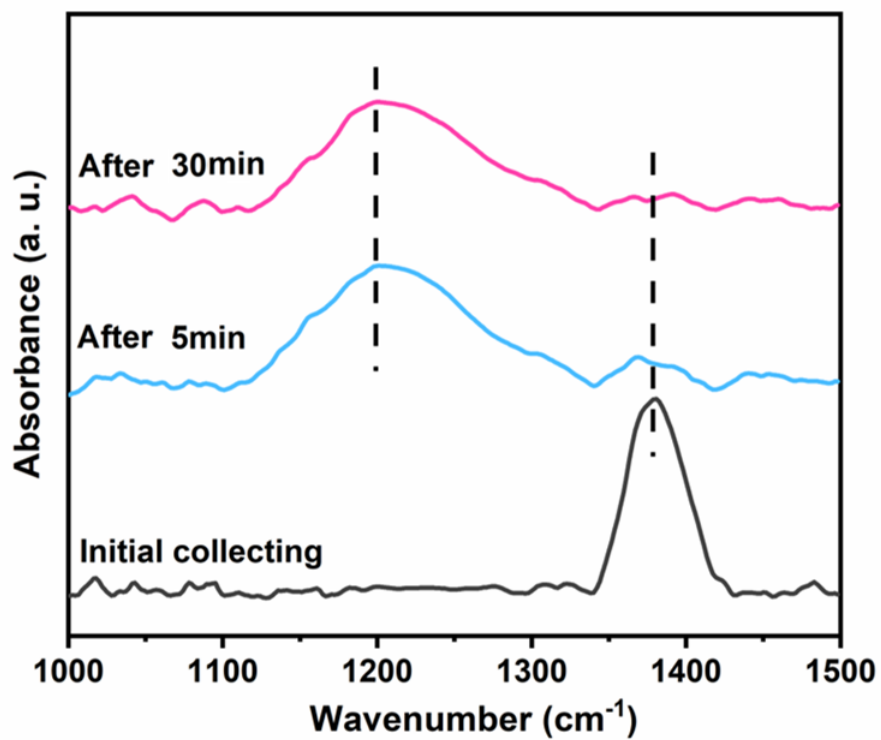

Supplementary Fig. 27 *Operando* SR-FTIR of Cu/N<sub>0.14</sub>C in the electrolyte of D<sub>2</sub>O.

**a**

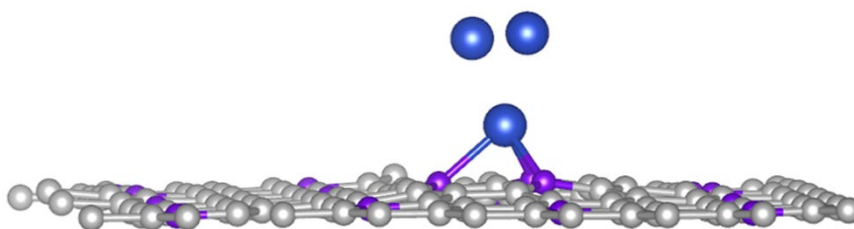

**b**

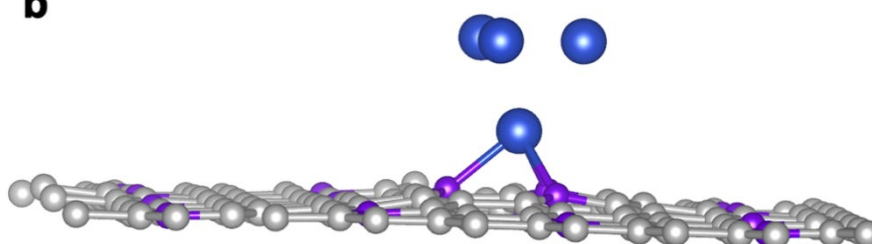

**Supplementary Fig. 28 The atomic configurations. a** Cu<sub>2</sub>-CuN<sub>3</sub>, **b** Cu<sub>3</sub>-CuN<sub>3</sub>. The balls in gray, purple, blue represented C, N, Cu, respectively.

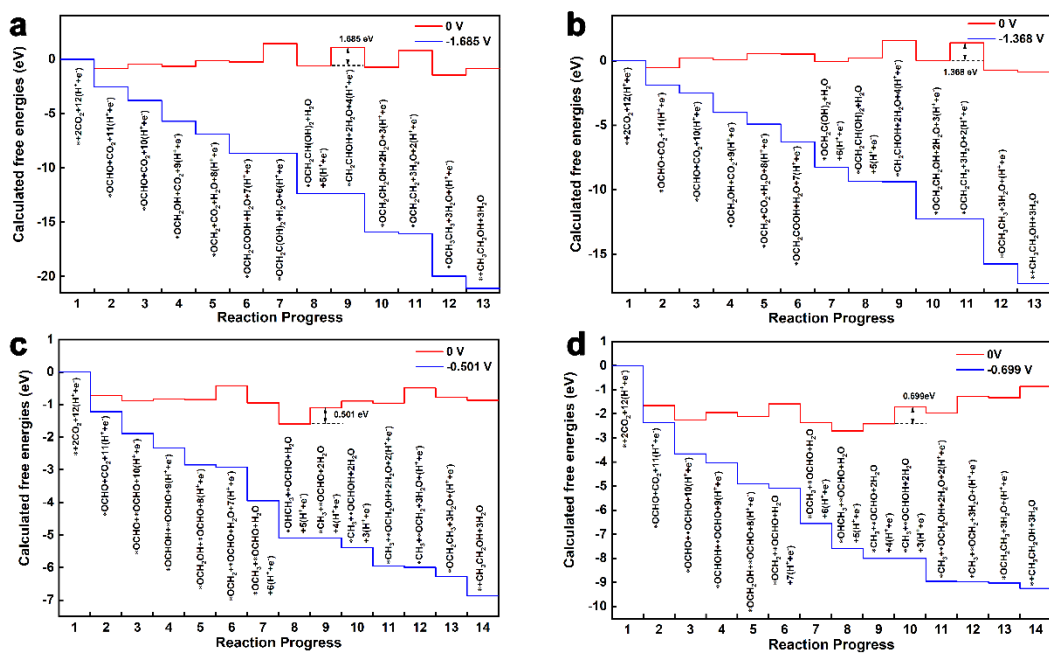

**Supplementary Fig. 29** DFT calculated of CO<sub>2</sub>RR activity. **a** Reaction progress of CO<sub>2</sub> to CH<sub>3</sub>CH<sub>2</sub>OH on the CuN<sub>3</sub> at 0 V and –1.685 V applied potential. **b** Cu-CuN<sub>3</sub> at 0 and –1.368 V applied potential, **c** Cu<sub>2</sub>-CuN<sub>3</sub> at 0 and –0.501 V applied potential and **d** Cu<sub>3</sub>-CuN<sub>3</sub> at 0 and –0.699 V applied potential. The \* showed the reaction site.



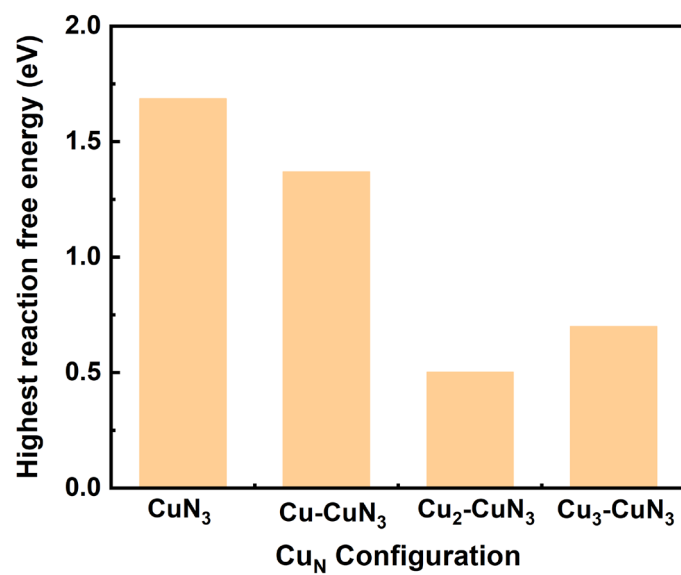

**Supplementary Fig. 30** The highest reaction free energy of the Cu-N<sub>3</sub>, Cu-CuN<sub>3</sub>, Cu<sub>2</sub>-CuN<sub>3</sub> and Cu<sub>3</sub>-CuN<sub>3</sub>.

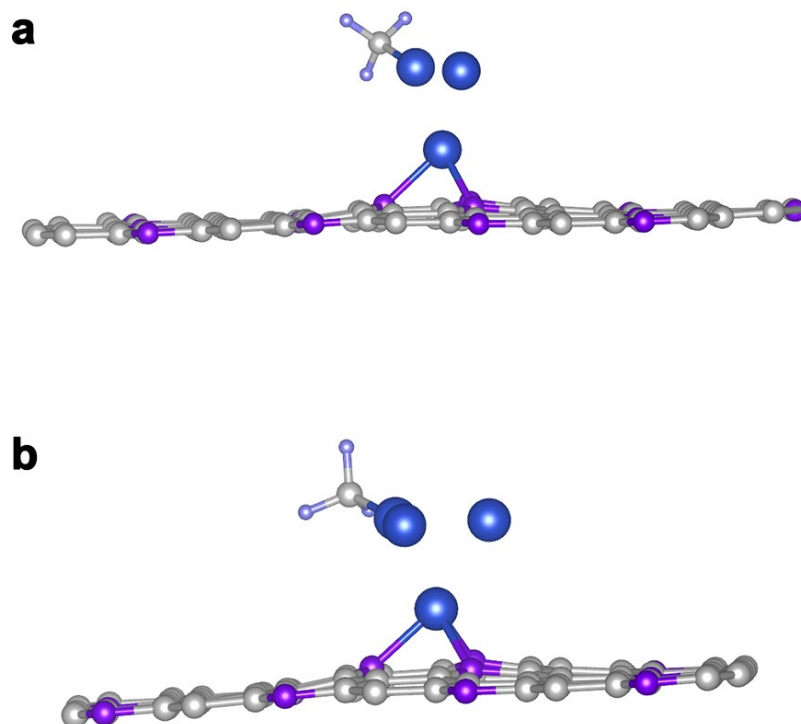

**Supplementary Fig. 31** The atomic configuration of  $\text{CH}_3$  adsorbs to  $\text{Cu}_n\text{-CuN}_3$ . **a**  $\text{Cu}_2\text{-CuN}_3$ . **b**  $\text{Cu}_3\text{-CuN}_3$ . Balls in gray, purple, blue and white represented C, N, Cu and H atoms, respectively.

**Supplementary Table 1.** Structural parameters of Cu/N<sub>0.14</sub>C electrode from OC to -1.4 V vs. RHE in 0.1 M KHCO<sub>3</sub> as well as reference samples obtained from the Cu *K*-edge EXAFS fitting. ( $S_0^2=0.8$ )<sup>a)</sup>

| Sample                 | Atomic scatter | No. of atoms (CN)<br>b) | Interatomic distance (Å) <sup>c)</sup> | Debye-Waller factor (10 <sup>-3</sup> ×Å <sup>2</sup> ) <sup>d)</sup> | Δ <i>E</i> <sub>0</sub> (eV)<br>e) | <i>R</i> factor |
|------------------------|----------------|-------------------------|----------------------------------------|-----------------------------------------------------------------------|------------------------------------|-----------------|
| Cu-foil                | Cu-Cu          | 12                      | 2.54±0.03                              | 9.1±1.8                                                               | 2.2                                | 0.001           |
| Cu <sub>2</sub> O      | Cu-O           | 2                       | 1.85±0.02                              | 2.9±0.5                                                               | 8.2                                | 0.007           |
| CuO                    | Cu-O           | 4                       | 1.95±0.02                              | 3.8±0.8                                                               | -0.4                               | 0.003           |
| Cu/N <sub>0.14</sub> C | Cu-O/N         | 3.4±0.7                 | 1.93±0.02                              | 7.8±1.6                                                               | 2.7                                | 0.002           |
| OC                     | Cu-O/N         | 3.4±0.7                 | 1.93±0.02                              | 7.7±1.6                                                               | 2.9                                | 0.001           |
| -0.6V                  | Cu-O/N         | 3.3±0.6                 | 1.92±0.02                              | 7.0±1.4                                                               | 2.5                                | 0.001           |
| -0.8V                  | Cu-O/N         | 2.7±0.5                 | 1.92±0.02                              | 6.1±1.2                                                               | 2.7                                | 0.001           |
|                        | Cu-Cu          | 0.2±0.04                | 2.58±0.03                              | 7.0±1.4                                                               | 8.5                                |                 |
| -0.9V                  | Cu-O/N         | 2.4±0.5                 | 1.92±0.02                              | 6.4±1.2                                                               | 2.4                                | 0.008           |
|                        | Cu-Cu          | 1.1±0.2                 | 2.54±0.03                              | 6.7±1.5                                                               | 4.6                                |                 |
| -1.0V                  | Cu-O/N         | 2.3±0.5                 | 1.92±0.02                              | 6.4±1.2                                                               | 2.4                                | 0.007           |
|                        | Cu-Cu          | 1.6±0.3                 | 2.54±0.03                              | 8.0±1.6                                                               | 4.4                                |                 |
| -1.1V                  | Cu-O/N         | 2.3±0.5                 | 1.92±0.02                              | 7.6±1.5                                                               | 2.3                                | 0.003           |
|                        | Cu-Cu          | 2.0±0.4                 | 2.53±0.03                              | 8.2±1.7                                                               | 3.4                                |                 |
| -1.2V                  | Cu-O/N         | 2.2±0.4                 | 1.92±0.02                              | 9.3±1.9                                                               | 2.4                                | 0.001           |
|                        | Cu-Cu          | 2.6±0.5                 | 2.53±0.03                              | 10.1±2.1                                                              | 2.1                                |                 |
| -1.3V                  | Cu-O/N         | 2.0±0.4                 | 1.91±0.02                              | 6.3±1.2                                                               | 1.3                                | 0.001           |
|                        | Cu-Cu          | 2.7±0.5                 | 2.53±0.03                              | 8.4±1.7                                                               | 1.8                                |                 |
| -1.4V                  | Cu-O/N         | 2.0±0.4                 | 1.91±0.02                              | 7.9±1.6                                                               | 1.2                                | 0.001           |

|  |       |         |           |         |     |  |
|--|-------|---------|-----------|---------|-----|--|
|  | Cu-Cu | 2.7±0.5 | 2.53±0.03 | 7.6±1.5 | 2.1 |  |
|--|-------|---------|-----------|---------|-----|--|

- a)  $S\sigma^2$  was fixed as 0.8 based on Cu foil fitting result. Error bounds were estimated as  $N \pm 20\%$ .
- b) CN was the coordination number.
- c) Interatomic distance (R) was bond length between copper atoms and coordination atoms.
- d) Debye-Waller factor ( $\sigma^2$ ) was the static and thermal disorder.
- e)  $\Delta E_0$  was the energy shift between zero kinetic energy values of the theoretical model and that of samples.

**Supplementary Table 2.** Structural parameters of Cu/N<sub>0.14</sub>C as well as Cu/N<sub>0.11</sub>C, Cu/N<sub>0.02</sub>C and Cu/C **obtained** from the Cu *K*-edge EXAFS fitting. ( $S_0^2=0.8$ ).<sup>a)</sup>

| Sample                 | Atomic scatter | No. of atoms (CN)<br><sup>b)</sup> | Interatomic distance (Å) <sup>c)</sup> | Debye-Waller factor ( $10^{-3} \times \text{Å}^2$ ) <sup>d)</sup> | $\Delta E_0$ (eV)<br><sup>e)</sup> | R factor |
|------------------------|----------------|------------------------------------|----------------------------------------|-------------------------------------------------------------------|------------------------------------|----------|
| Cu-foil                | Cu-Cu          | 12                                 | 2.54±0.03                              | 9.1±1.8                                                           | 2.2                                | 0.001    |
| Cu/N <sub>0.14</sub> C | Cu-O/N         | 3.4±0.7                            | 1.93±0.02                              | 7.8±1.6                                                           | 2.7                                | 0.002    |
| Cu/N <sub>0.11</sub> C | Cu-O/N         | 1.8±0.4                            | 1.91±0.02                              | 7.3±1.3                                                           | 4.7                                | 0.001    |
|                        | Cu-Cu          | 4.0±0.8                            | 2.54±0.03                              | 7.7±1.5                                                           | 3.8                                |          |
| Cu/N <sub>0.02</sub> C | Cu-Cu          | 6.9±1.4                            | 2.54±0.03                              | 8.8±1.7                                                           | 3.3                                | 0.003    |
| Cu/C                   | Cu-Cu          | 7.3±1.5                            | 2.54±0.03                              | 9.0±1.8                                                           | 2.1                                | 0.013    |

<sup>a)</sup>  $S_0^2$  was fixed as 0.8 based on Cu foil fitting result. Error bounds were estimated as  $N \pm 20\%$ .

<sup>b)</sup> CN was the coordination number.

<sup>c)</sup> Interatomic distance (R) was bond length between copper atoms and coordination atoms.

<sup>d)</sup> Debye-Waller factor ( $\sigma^2$ ) was the static and thermal disorder.

<sup>e)</sup>  $\Delta E_0$  was the energy shift between zero kinetic energy values of the theoretical model and that of samples.

**Supplementary Table 3. Comparison of CO<sub>2</sub>RR activities for some catalysts.**

| No. | Catalyst                               | Electrolyte                        | Potential (V vs. RHE) | Partial current density (mA cm <sup>-2</sup> ) | Product                               | FE % | C <sub>2+</sub> FE % | Electrode       | Ref.                                                          |
|-----|----------------------------------------|------------------------------------|-----------------------|------------------------------------------------|---------------------------------------|------|----------------------|-----------------|---------------------------------------------------------------|
|     | Cu/N <sub>0.14</sub> C                 | 0.1 M KHCO <sub>3</sub>            | -1.1                  | 14.4                                           | C <sub>2</sub> H <sub>5</sub> O<br>H  | 51   | 73                   | H-type Cell(HC) | This work                                                     |
| 1   | Cu-P1                                  | 1 M KOH                            | -0.97                 | 312                                            | C <sub>2</sub> H <sub>4</sub>         | 72   | 90                   | Flow Cell (FC)  | <i>Nat. Catal.</i> , <b>2021</b> , 4, 20-27                   |
|     |                                        | 10 M KOH                           | -0.47                 | -                                              |                                       | 87   | 93                   |                 |                                                               |
| 2   | Cu/GDL                                 | 2 M KCl + 0.01 M KHCO <sub>3</sub> | -1.2                  | -                                              | C <sub>2</sub> H <sub>4</sub>         | 39.9 | 82                   | HC              | <i>J. Am. Chem. Soc.</i> <b>2021</b> , 143, 3245-3255         |
| 3   | 20% Cu/CuSiO <sub>3</sub>              | 0.1 M KHCO <sub>3</sub>            | -1.1                  | 20.20                                          | C <sub>2</sub> H <sub>4</sub>         | 51.8 | -                    | HC              | <i>Angew. Chem. Int. Ed.</i> , <b>2021</b> , 60, 15344-15347  |
| 4   | 34% N-C/Cu                             | 1 M KOH                            | -0.68                 | 156                                            | C <sub>2</sub> H <sub>5</sub> O<br>H  | 52   | 93                   | FC              | <i>Nat. Energy</i> , <b>2020</b> , 5, 478-486                 |
| 5   | Cu-CO <sub>2</sub>                     | 7 M KOH                            | -0.67                 | 280                                            | C <sub>2</sub> H <sub>4</sub>         | 60   | 90                   | FC              | <i>Nat. Catal.</i> , <b>2020</b> , 3, 98-106                  |
| 6   | Cu-SA/NPC                              | 0.1 M KHCO <sub>3</sub>            | -0.36                 | -                                              | CH <sub>3</sub> C<br>OCH <sub>3</sub> | 36.7 | -                    | HC              | <i>Nat. Commun.</i> <b>2020</b> , 11, 2455                    |
| 7   | OBC (Cu <sub>4</sub> O)                | 0.5 M KHCO <sub>3</sub>            | -0.95                 | 44.7                                           | C <sub>2</sub> H <sub>4</sub>         | 45   | -                    | HC              | <i>J. Am. Chem. Soc.</i> <b>2020</b> , 142, 26, 11417-11427   |
| 8   | H-Cu MPs                               | 0.1 M KHCO <sub>3</sub>            | -0.82                 | 9                                              | C <sub>2</sub> H <sub>4</sub>         | 50.1 | 67.3                 | HC              | <i>Nano Letters</i> , <b>2020</b> , 20, 7, 4823-4828          |
| 9   | CuSAs/TCNFs                            | 0.1 M KHCO <sub>3</sub>            | -0.9                  | 93                                             | CH <sub>3</sub> O<br>H                | 44   | -                    | HC              | <i>J. Am. Chem. Soc.</i> <b>2019</b> , 141, 12717-12723       |
| 10  | Cu <sub>0.5</sub> NC                   | 0.1 M CsHCO <sub>3</sub>           | -1.2                  | 12                                             | C <sub>2</sub> H <sub>5</sub> O<br>H  | 55   | 80                   | HC              | <i>Angew. Chem. Int. Ed.</i> , <b>2019</b> , 58, 15098-15103. |
| 11  | Ag <sub>0.14</sub> /Cu <sub>0.86</sub> | 1 M KOH                            | -0.67                 | 250                                            | C <sub>2</sub> H <sub>5</sub> O<br>H  | 41   | 80                   | FC              | <i>J. Am. Chem. Soc.</i> , <b>2019</b> , 141, 8584-8591       |
| 12  | CuPc                                   | 0.5 M KHCO <sub>3</sub>            | -1.06                 | 13                                             | CH <sub>4</sub>                       | 66   | -                    | HC              | <i>Nat. Commun.</i> <b>2018</b> , 9, 415.                     |
| 13  | Cu(B)-2                                | 0.1 M KCl                          | -1.1                  | 70                                             | C <sub>2</sub> H <sub>4</sub>         | 52   | 79                   | HC              | <i>Nat. chem.</i> , <b>2018</b> , 10, 974-980                 |
| 14  | Mesopore Cu 30/40                      | 0.1 M KHCO <sub>3</sub>            | -1.7                  | 5.7                                            | C <sub>2</sub> H <sub>4</sub>         | 38   | 46                   | HC              | <i>Angew. Chem. Int. Ed.</i> , <b>2017</b> , 56, 796-800      |

### 3. Supplementary References

1. Ravel, B. & Newville, M. ATHENA, ARTEMIS, HEPHAESTUS: data analysis for X-ray absorption spectroscopy using IFEFFIT. *J. of Synchrotron Radiat.* **12**, 537-541 (2005).
2. O Bunău and Y Joly. *J. Phys.: Condens. Matter* **21** 345501 (2009).
3. Kau, L. *et al.* X-ray Absorption Edge Determination of the Oxidation State and Coordination Number of Copper: Application to the type 3 site in *Thus vernicifera* Laccase and Its Reaction with Oxygen. *J. Am. Chem. Soc.* **109**, 6433-6442 (1987).
4. Bokhoven *et al.* X-ray Absorption and X-ray Emission Spectroscopy Theory and Applications. (Wiley, 2016).
